# Supplementary material for: Feasibility of home-based sampling of salivary cortisol and cortisone in healthy adults
Source: PubMed Central journal article supplement (PMC8561883; doi:10.1186/s13104-021-05820-4), 2021-11-02

Additional file 3: Sample size estimation for a future parallel group randomized controlled superiority trial (randomized in 1:1 ratio) powered at 80 % with a range of estimated relevant differences between groups. Estimations were based on the standard deviation (SD) of- and the correlation between the outcome at baseline and follow-up respectively with alpha=0.05 (see Table below). Calculations were carried out based on using the follow-up measure as outcome with adjustment for the outcome at baseline (similar to an analysis of co-variance).

Table: Change from baseline to follow-up for all participants in the SCREENS pilot trial

|                                      | Baseline (SD) | Follow-up (SD) | Change (SD) | Correlation |
|--------------------------------------|---------------|----------------|-------------|-------------|
| CARauc cortisol (nmol/L x minutes)   | 6.84 (2.97)   | 7.14 (3.02)    | 0.85 (1.46) | 0.89        |
| CARauc cortisone (nmol/L x minutes)  | 26.85 (7.47)  | 27.53 (6.81)   | 0.97 (3.69) | 0.81        |
| Peak-to-bed slope cortisol (nmol/L)  | 0.65 (0.32)   | 0.64 (0.33)    | 0.02 (0.21) | 0.73        |
| Peak-to-bed slope cortisone (nmol/L) | 2.28 (0.73)   | 2.30 (0.82)    | 0.05 (0.39) | 0.81        |

Data are presented as means with SD.

## Estimated sample size for CARauc cortisol

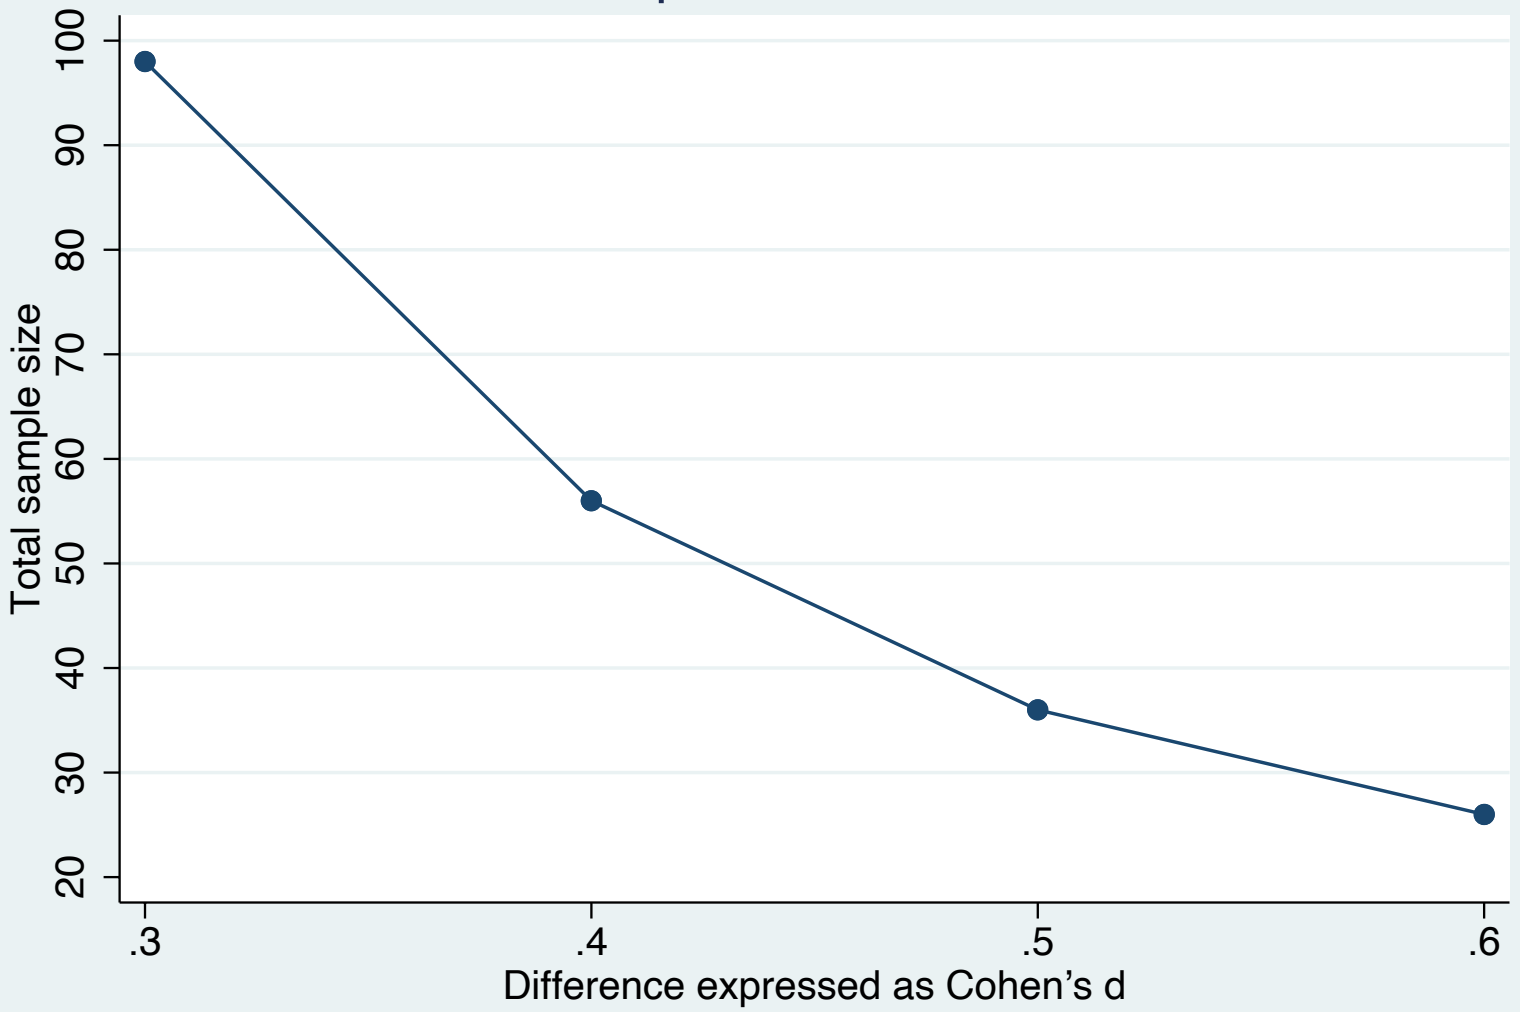

# Estimated sample size for CARauc cortisone

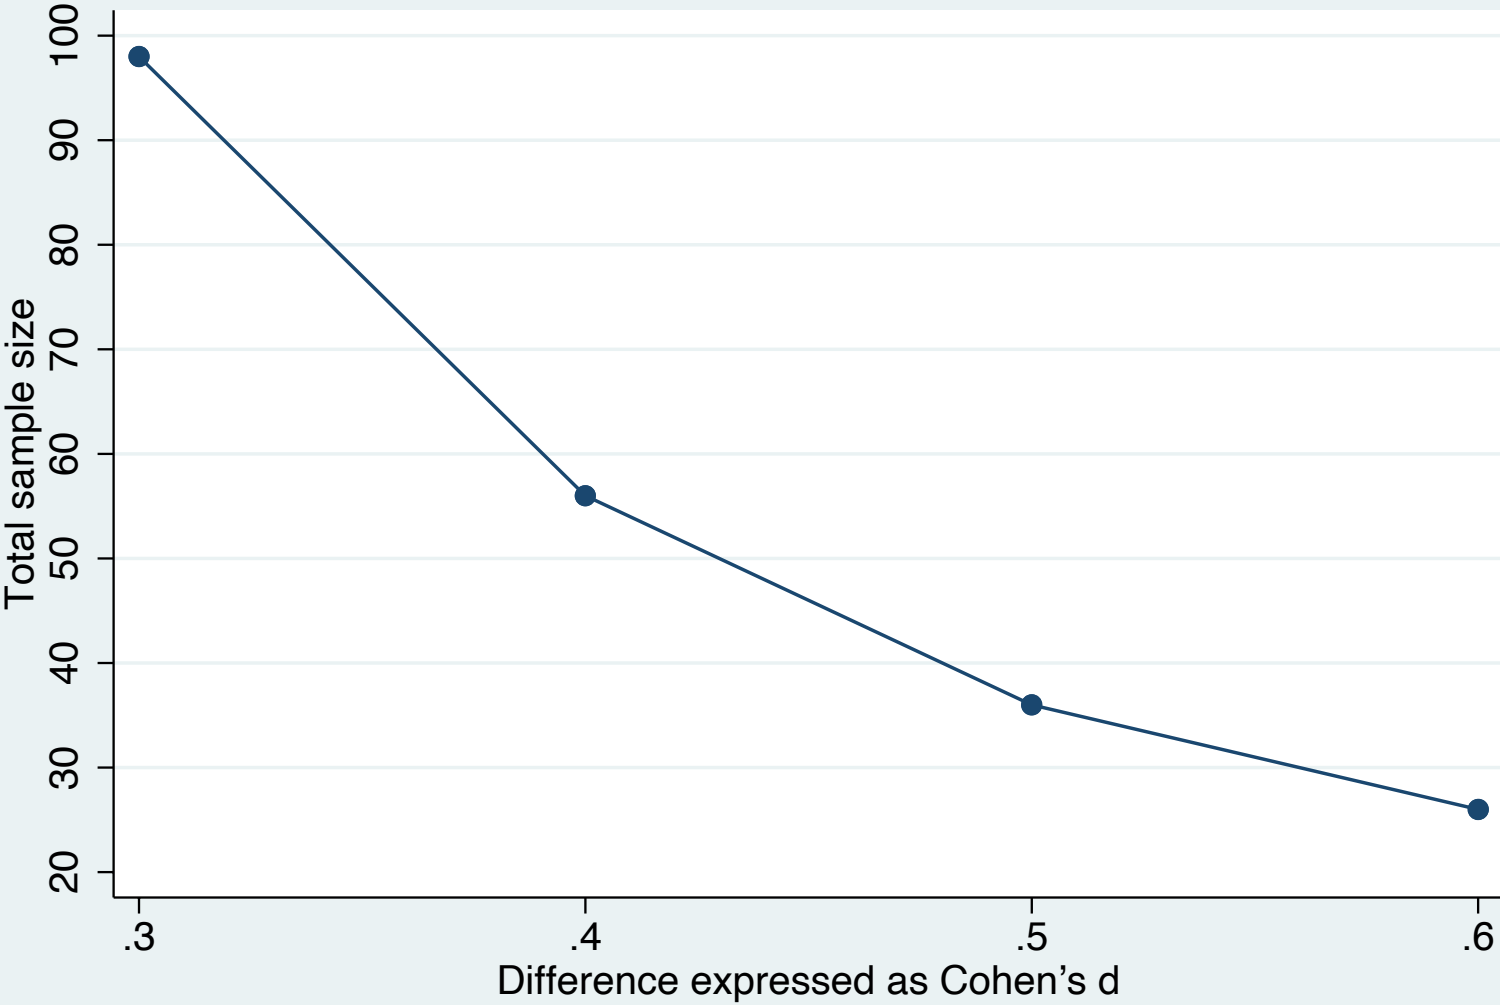

## Estimated sample size for Peak-to-bed cortisol slope

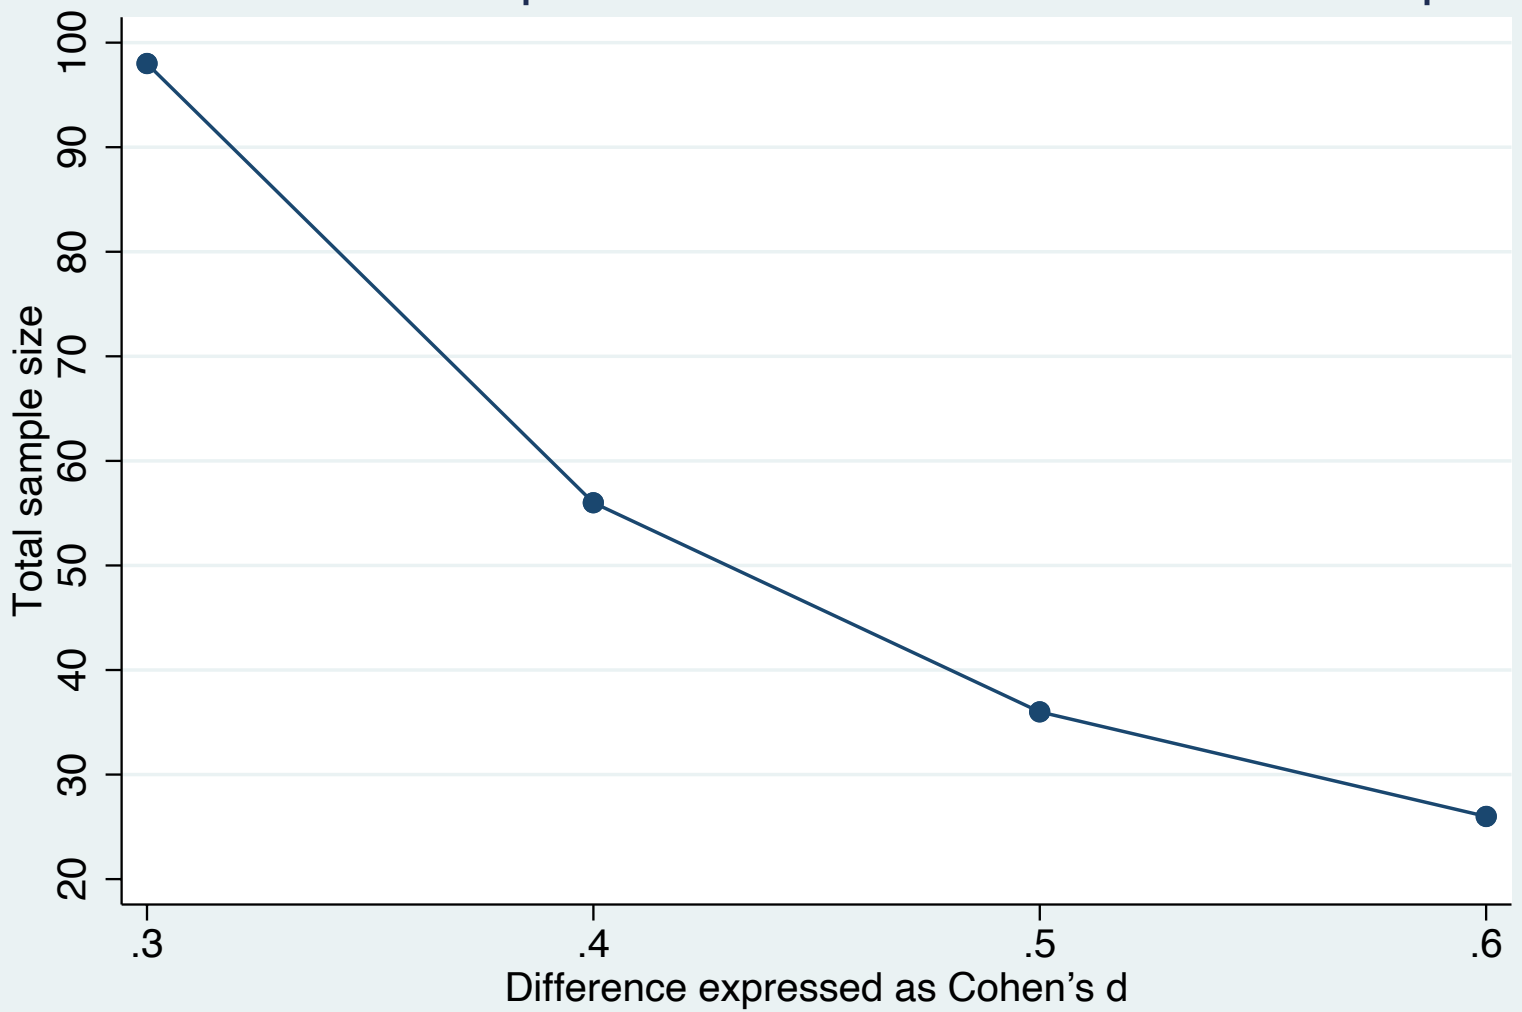

## Estimated sample size for Peak-to-bed cortisone slope

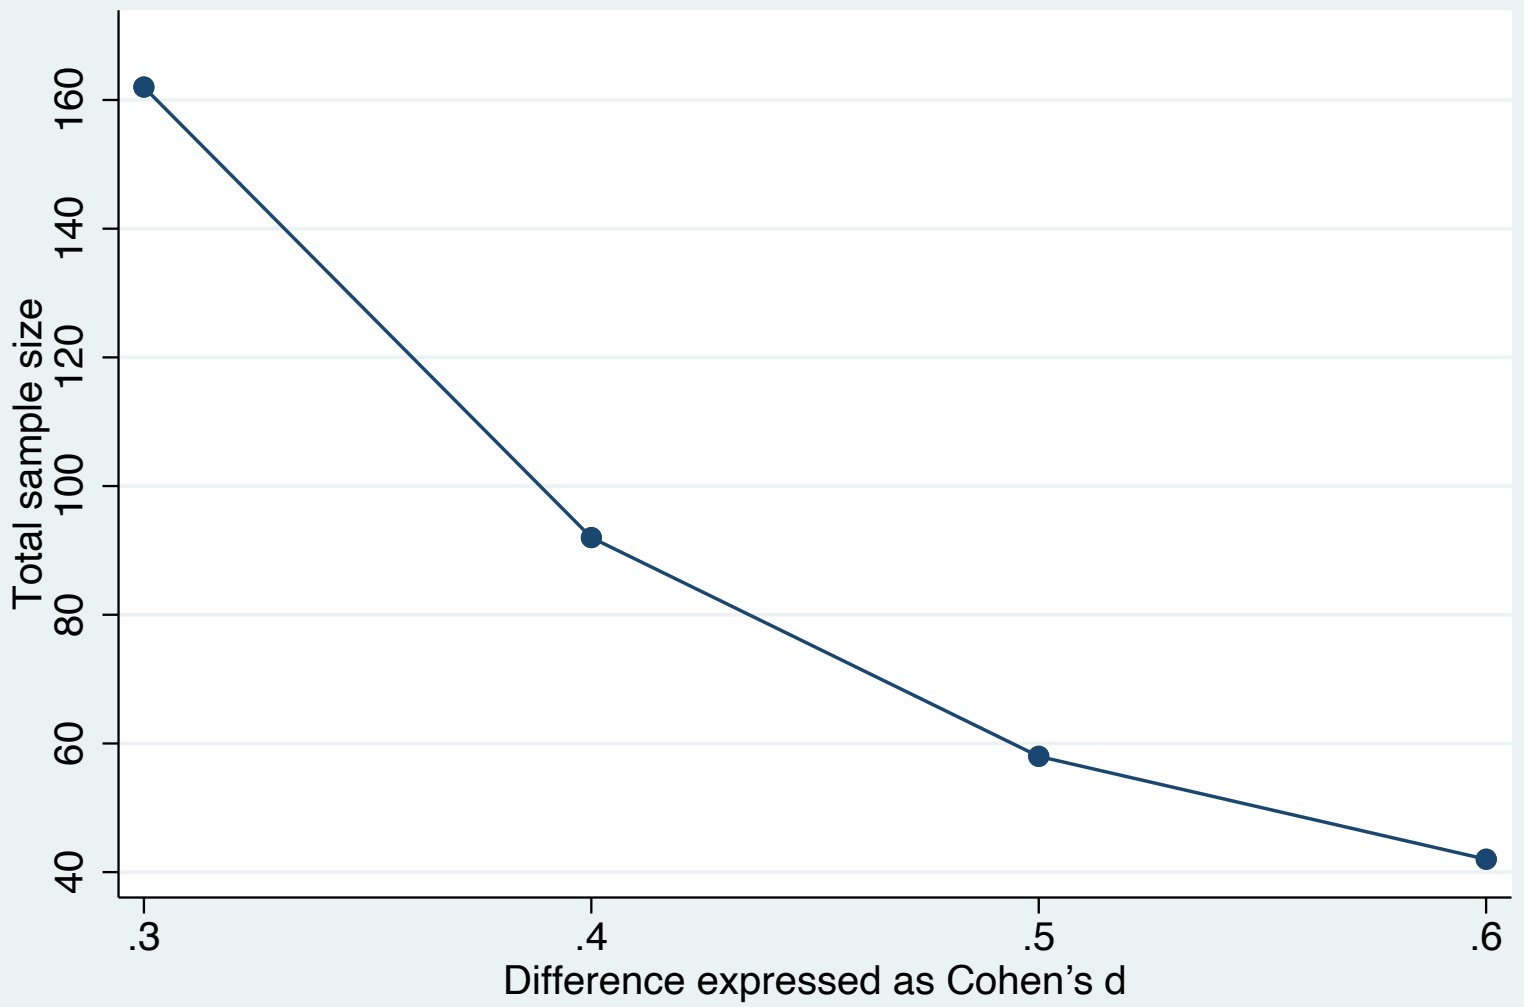

Supplement: 13104_2021_5820_MOESM3_ESM.pdf [file 13104_2021_5820_MOESM3_ESM.pdf]
