# Supplementary material for: Feasibility of home-based sampling of salivary cortisol and cortisone in healthy adults
Source: PubMed Central journal article supplement (PMC8561883; doi:10.1186/s13104-021-05820-4), 2021-11-02
Supplement: 13104_2021_5820_MOESM4_ESM.pdf [file 13104_2021_5820_MOESM4_ESM.pdf]

Additional file 4: Flow chart of exclusion from the analyses

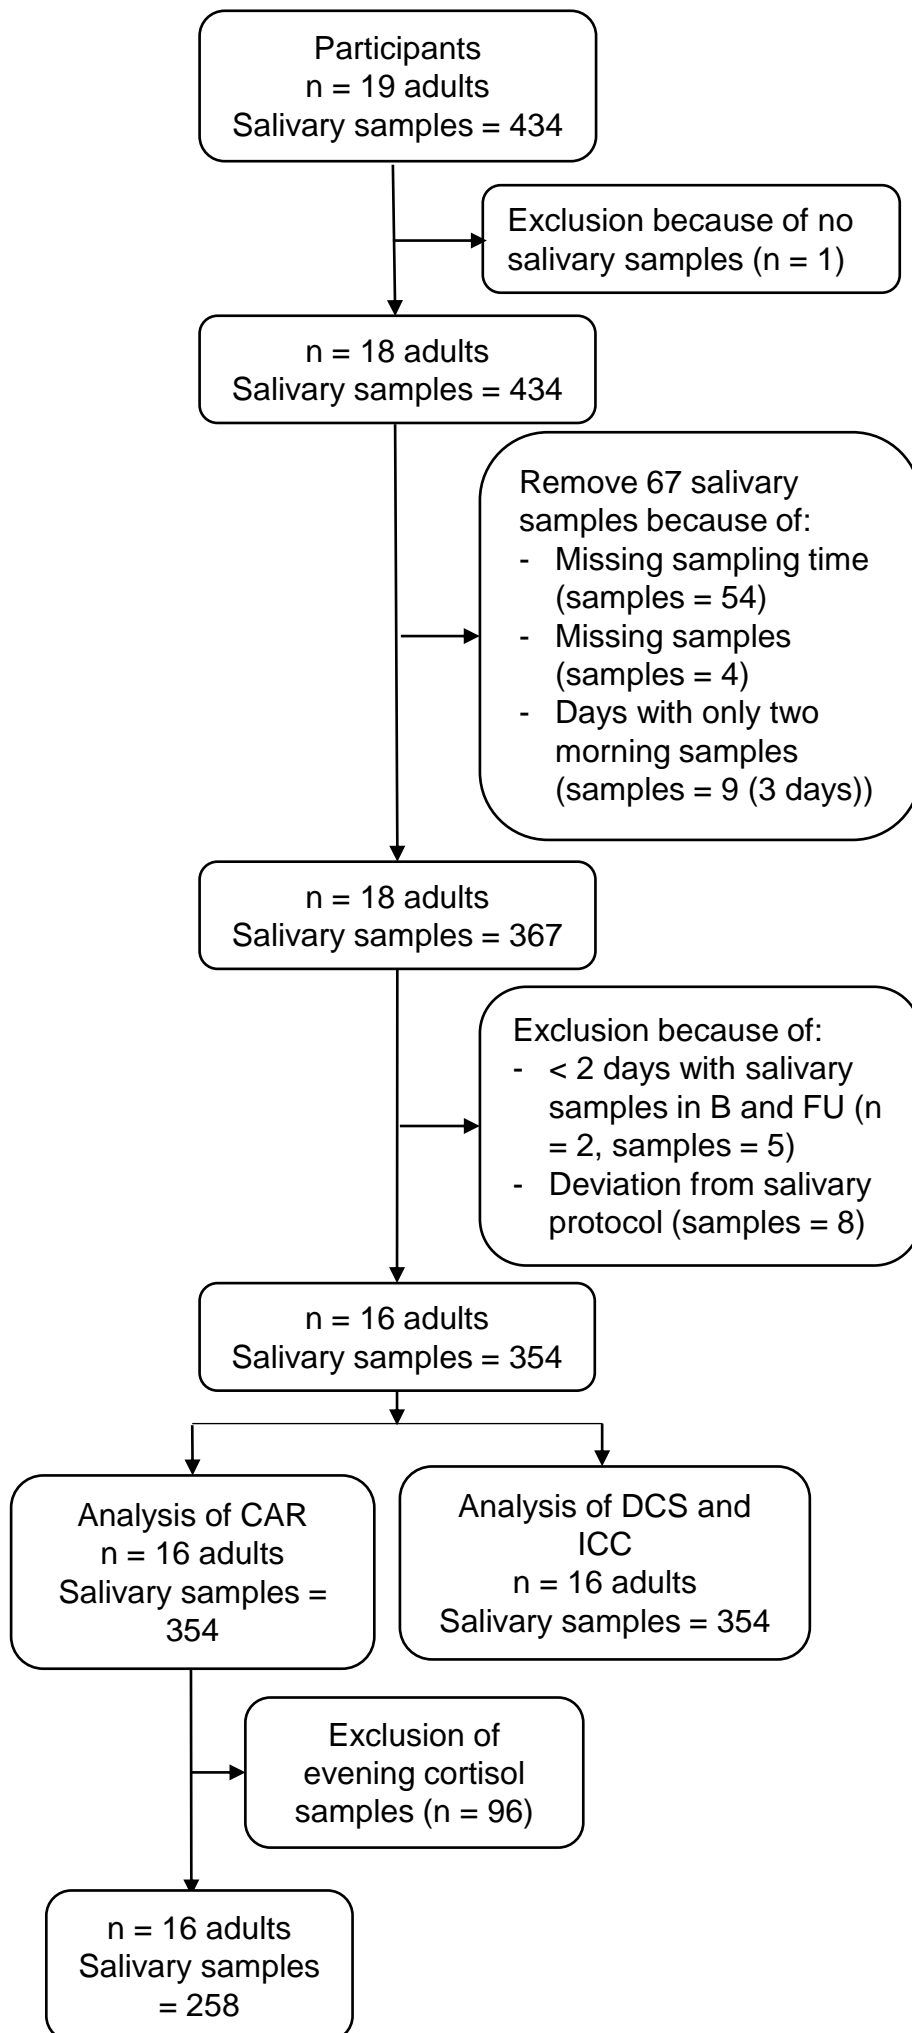

The figure shows a graphic presentation of the exclusion process before the analyses.

B = Baseline; FU = Follow-up; CAR = Cortisol awakening response; DCS = Diurnal cortisol slope; ICC = Intraclass correlation.
