# Supplementary material for: Feasibility of home-based sampling of salivary cortisol and cortisone in healthy adults
Source: PubMed Central journal article supplement (PMC8561883; doi:10.1186/s13104-021-05820-4), 2021-11-02

Additional file 7: The within-subject coefficient of variation (CV%) for samples obtained on comparable time-points on different days at baseline

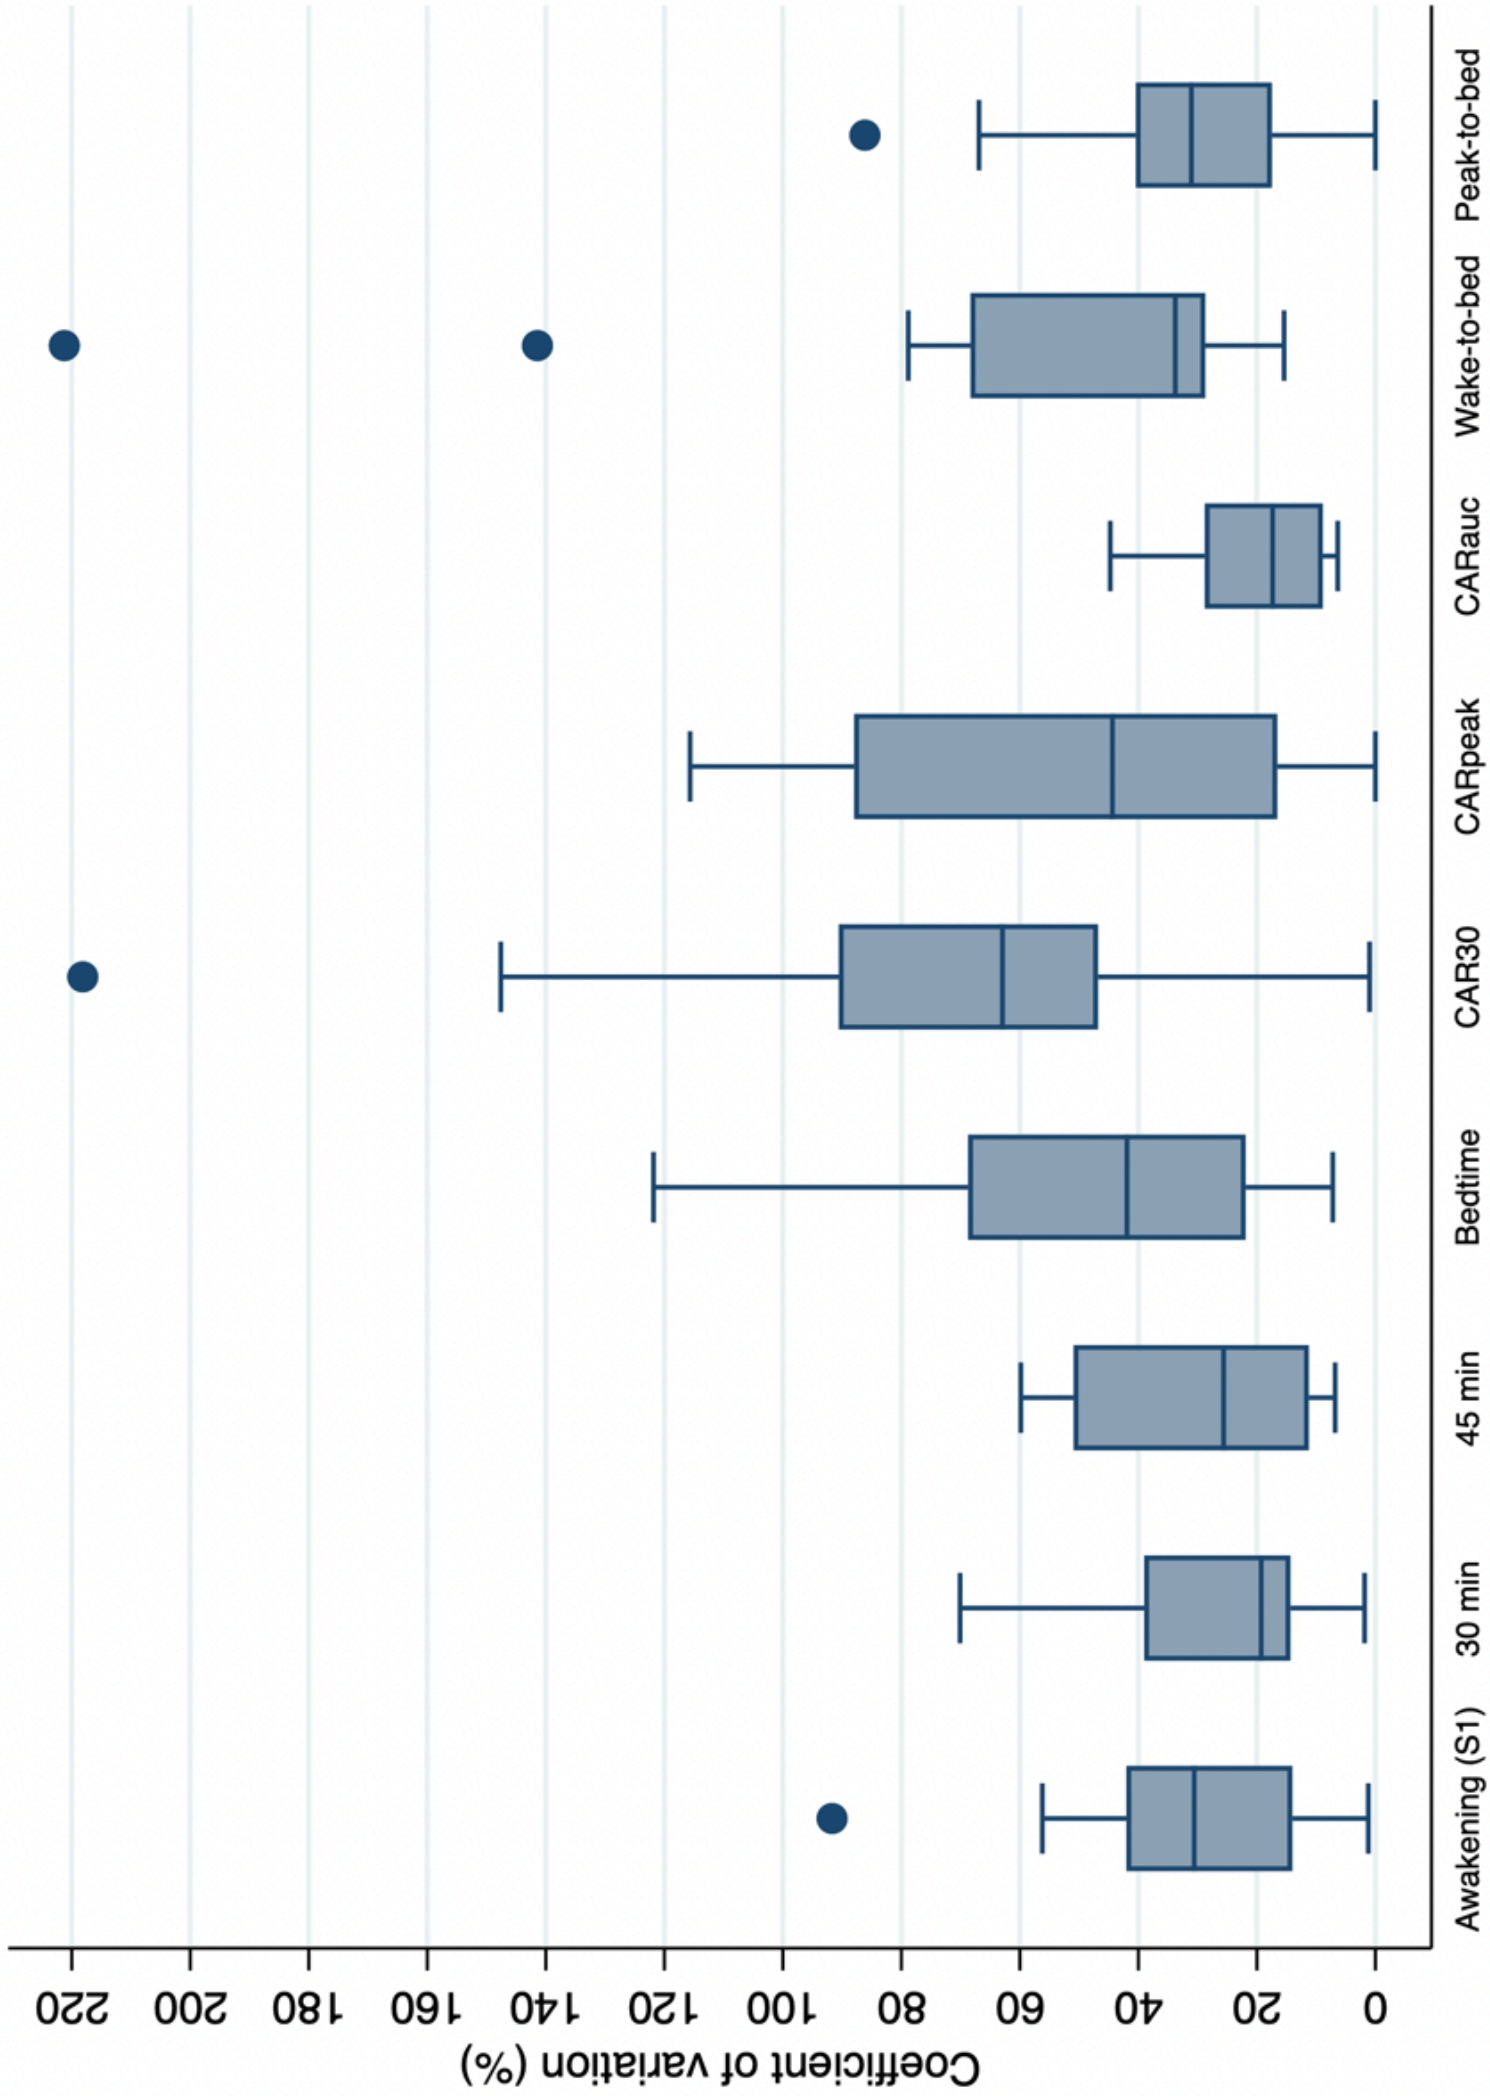

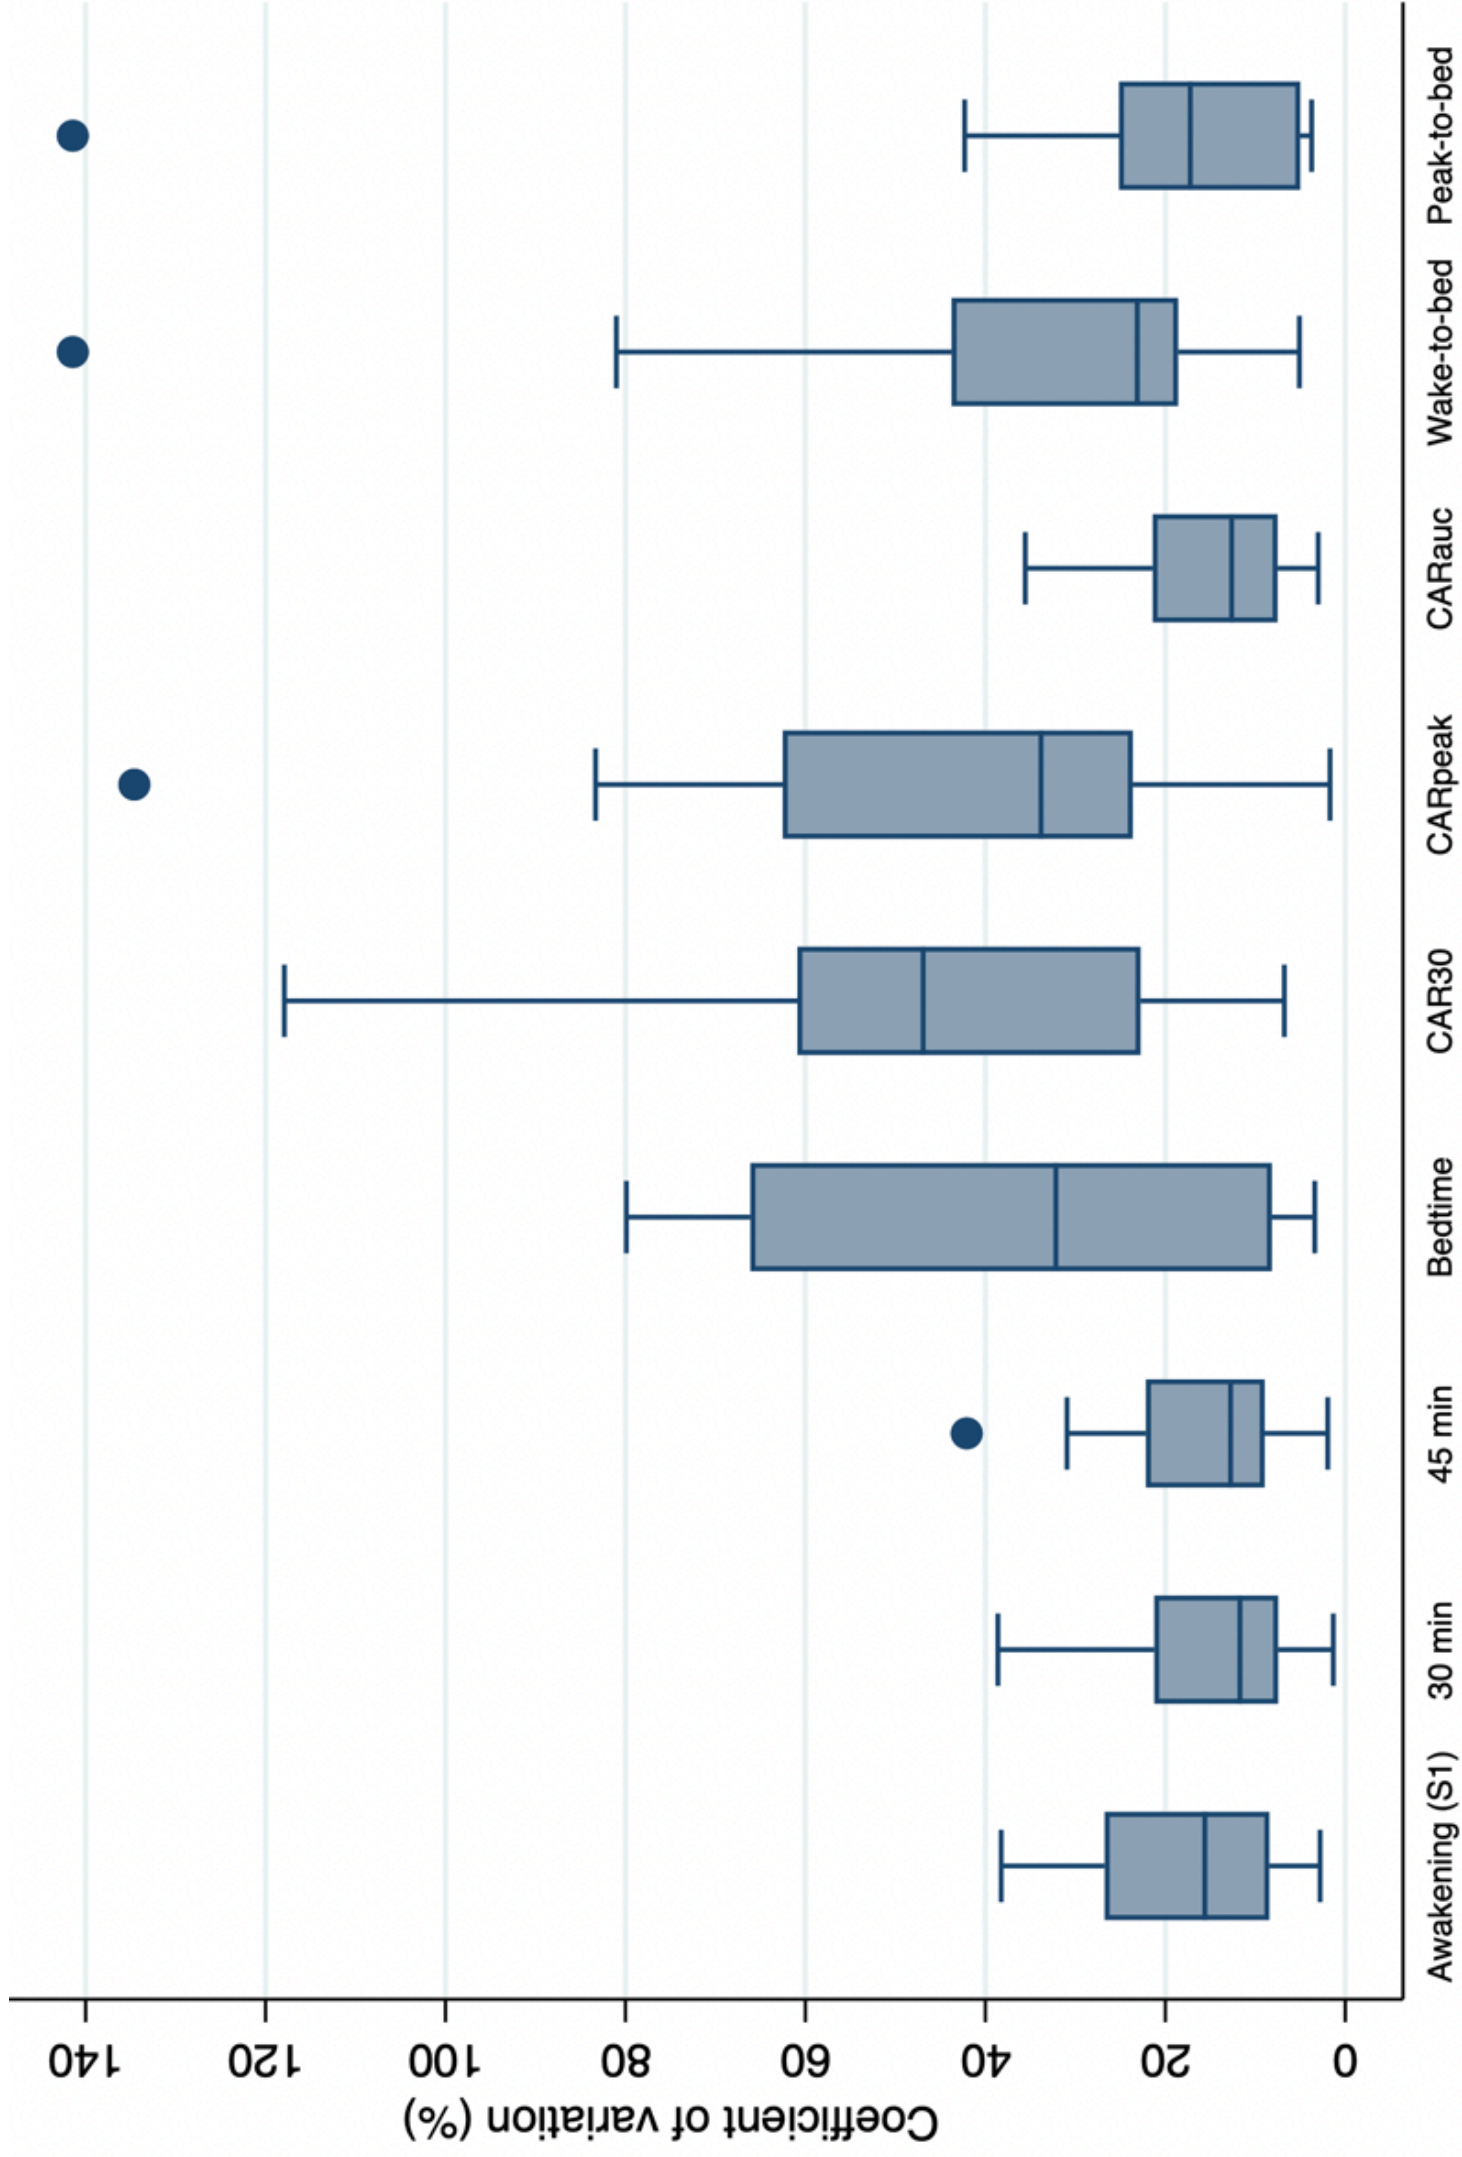

Supplement: 13104_2021_5820_MOESM7_ESM.pdf [file 13104_2021_5820_MOESM7_ESM.pdf]
