# Supplementary material for: Feasibility of home-based sampling of salivary cortisol and cortisone in healthy adults
Source: PubMed Central journal article supplement (PMC8561883; doi:10.1186/s13104-021-05820-4), 2021-11-02

Additional file 8: The within and between subject reproducibility for CARauc and peak-to-bed slope for cortisol at baseline and follow-up

# Reproducibility for CARauc for cortisol at baseline

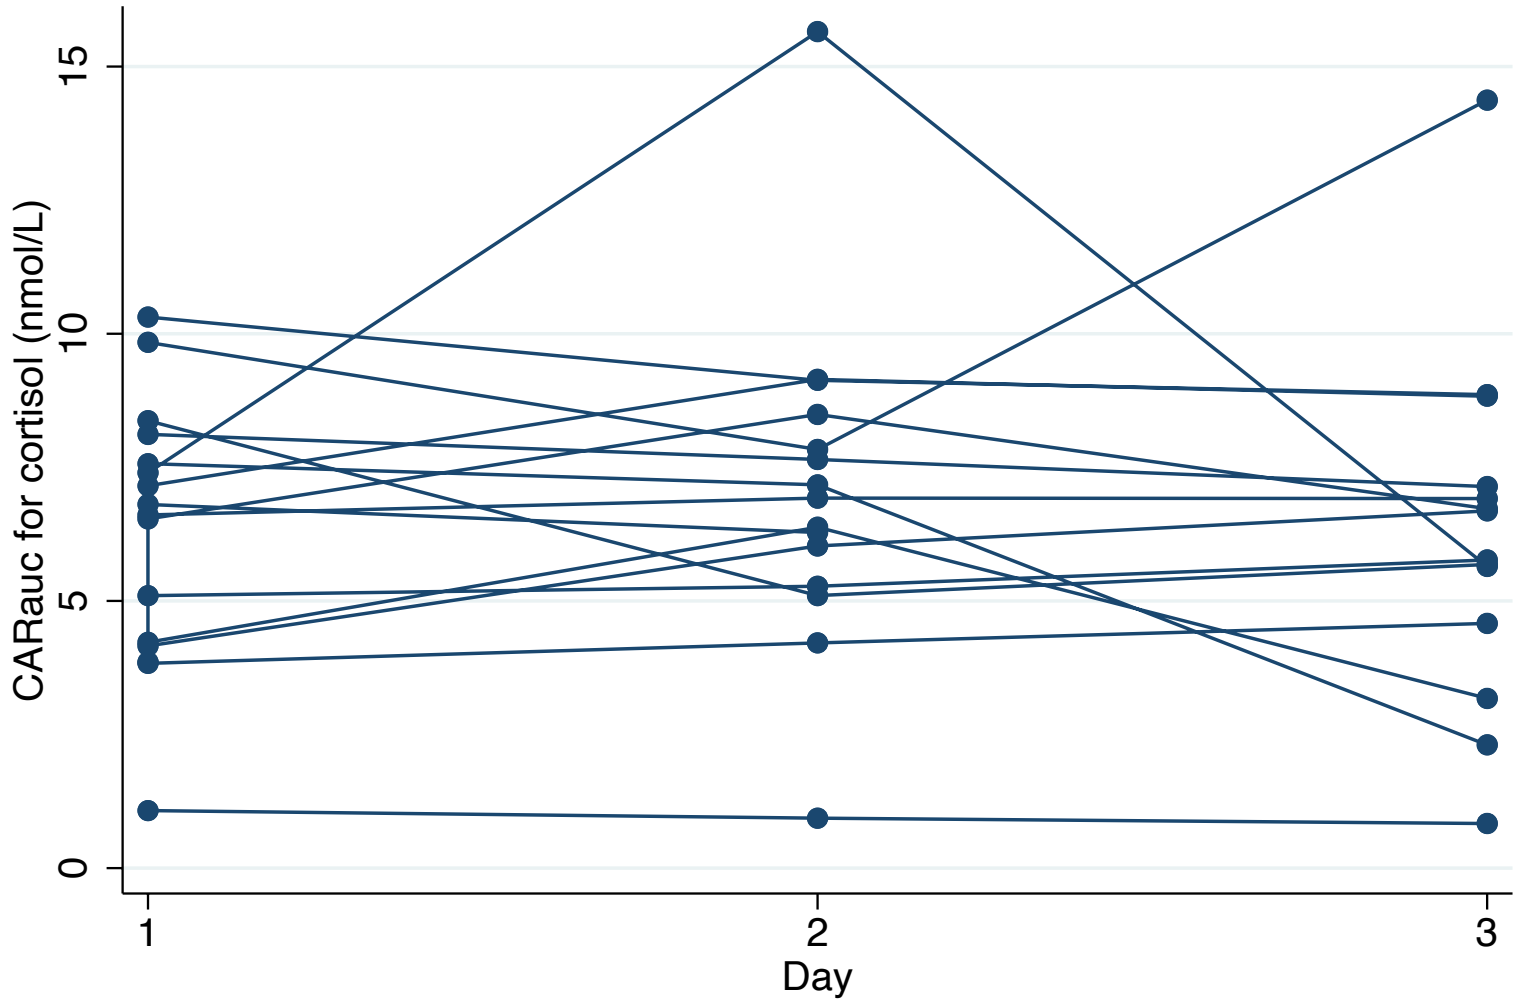

# Reproducibility for CARauc for cortisol at follow-up

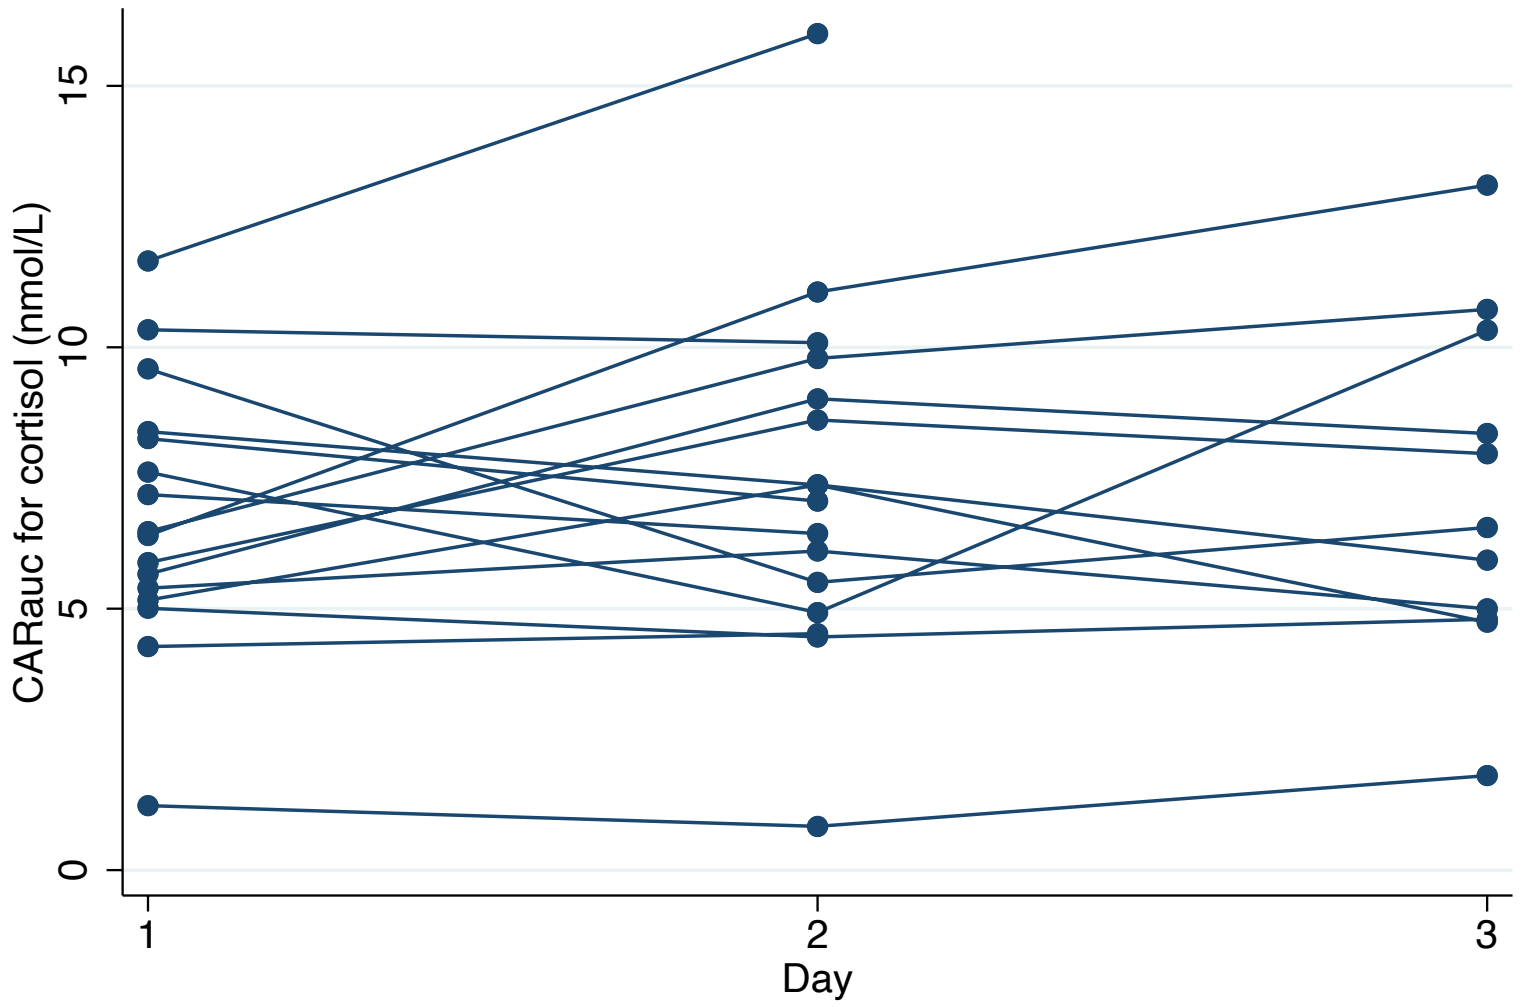

# Reproducibility for peak-to-bed cortisol slope at baseline

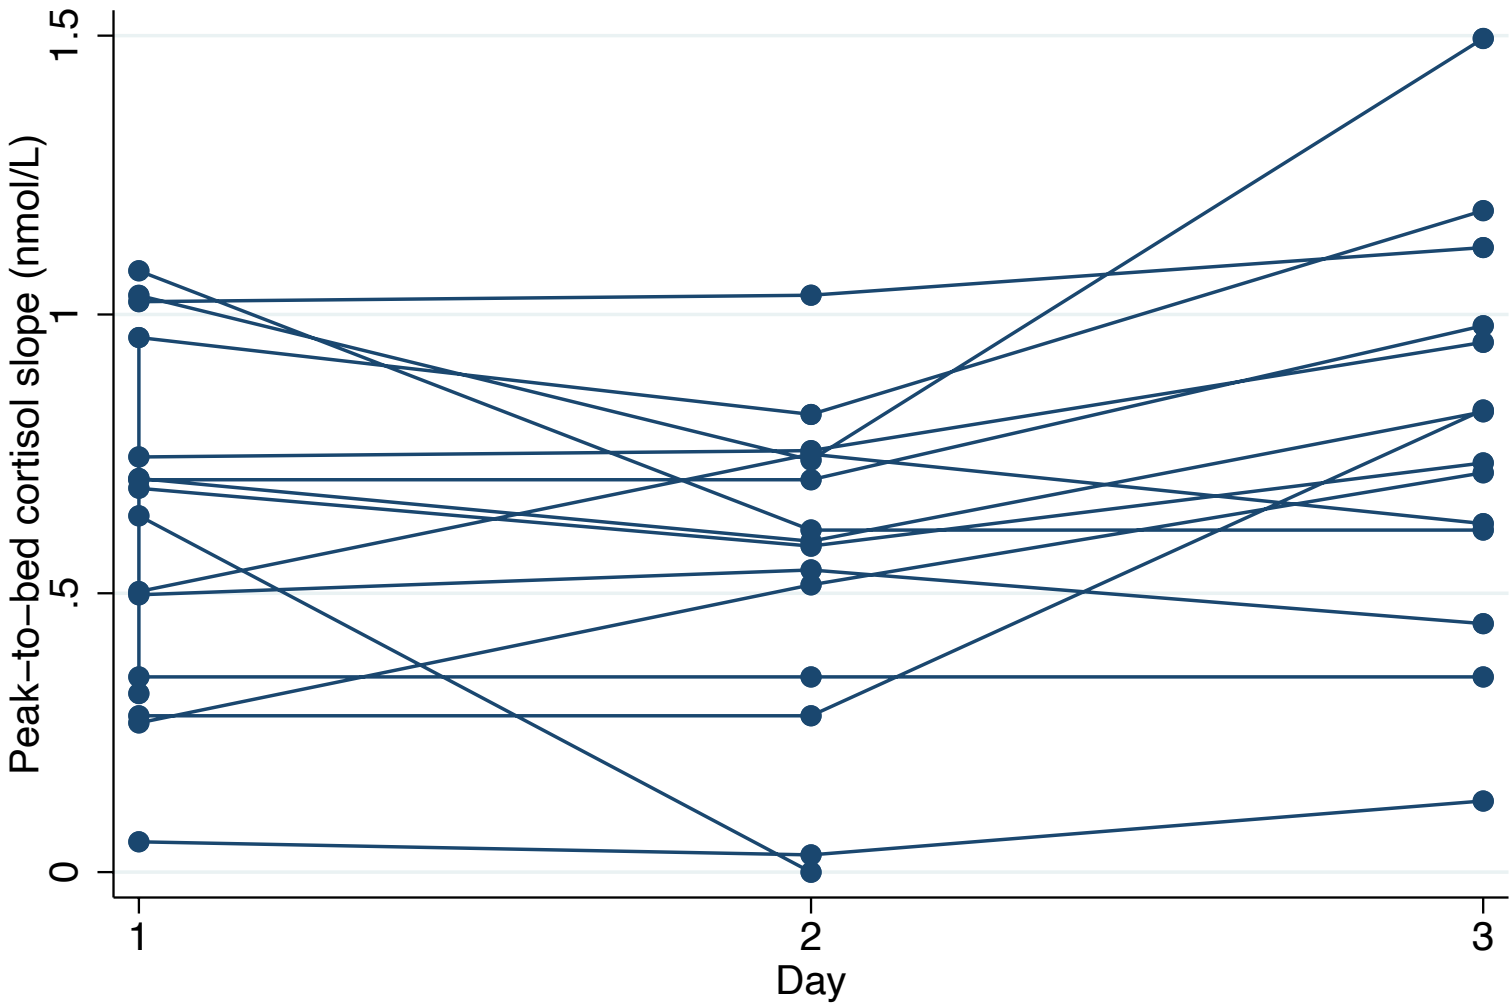

Supplement: 13104_2021_5820_MOESM8_ESM.pdf [file 13104_2021_5820_MOESM8_ESM.pdf]
